# Supplementary material
Source: Springer Nature journal article supplement (https://www.springermedizin.de/resource/supplementary/12990_2008_193_MOESM1_ESM.pdf/9612762)

**A**

hp = -70 mV

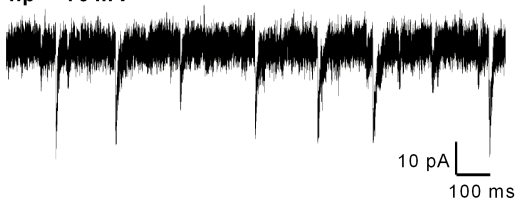**B**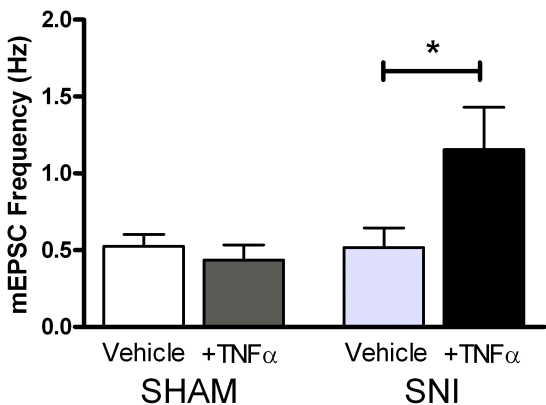**C**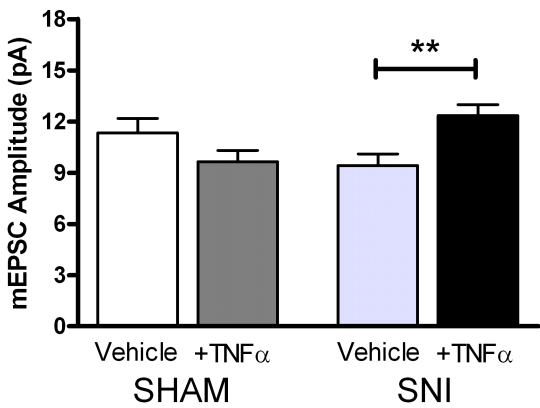

Supplement: MOESM1 [file 9612762]
